# Supplementary material
Source: PubMed Central journal article supplement (PMC8019682)
Supplement: NIHMS1641081-supplement-Supplementary_Material.pdf [file NIHMS1641081-supplement-Supplementary_Material.pdf]

## Supplemental Materials

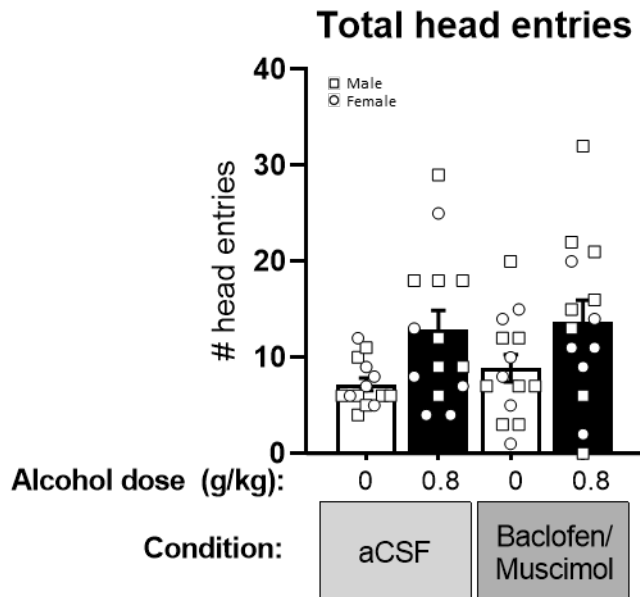

**Supplemental Figure 1.** Total head entries into the receptacle during test sessions depicted in Figure 6. There was a main effect of alcohol ( $F[1, 13]=9.04$ ,  $p=0.010$ ) with increased total head entries during alcohol sessions. There were no other significant effects suggesting that non-specific behavior was not disrupted by baclofen/muscimol injection.
